# Supplementary material for: Red Light Controls Adventitious Root Regeneration by Modulating Hormone Homeostasis in Picea abies Seedlings
Source: Front Plant Sci. 2020 Sep 9;11:586140. doi: 10.3389/fpls.2020.586140 (PMC7509059; doi:10.3389/fpls.2020.586140)
Supplement: Supplementary file 2 [file Table_1.xlsx]

## Sheet: Results
Norway Spruce seedlings were grown for three weeks in long day conditions as described in Methods.
When derooting the seedlings, 5 mm hypocotyl was taken for hormone quantification. This corresponded to time 0 (T0), before transfer to hormone free distilled water for different times.																						Under these 2 conditions :
Then 5 mm basal segments of derooted hypocotyls were harvested at different points:													6h, 6 hours after transferring the cuttings to cWL, cRL									cWL (constant White Light)
													24h, 24 hours after transferring the cuttings to cWL, cRL									cRL (constant Red Light)
													48h, 48 hours after transferring the cuttings to cWL, cRL
													72h, 72 hours after transferring the cuttings to cWL, cRL
Levels of jasmonates, auxins and salicylic acid (pmol/g FW; mean±SD)
Asterisks indicate statistically significant difference in the light conditions cRL versus cWL in an ANOVA analysis (t-test; *, **, and *** correspond to P-values of 0.05 > p > 0.01, 0.01 > p > 0.001, and p < 0.001, respectively).
Time	Light	JA				12-OH-JA				9,10-dh-JA				JA-Ile				JA-Val				JA-Trp		JA-Phe				cisOPDA
t0	Long day	0.137249	±	0.031112			<LOD				<LOD			0.0221243	±	0.00694303			<LOD			<LOD		0.174708	±	0.0479285		504.983	±	116.619
6h	cWL	2.19712	±	0.296862			<LOD				<LOD			0.329963	±	0.0797558			<LOD			<LOD		0.243214	±	0.0182931		800.785	±	209.542
	cRL	2.1329	±	0.469972		0.791612	±	0.0518498			<LOD			0.259368	±	0.0546164	**		<LOD			<LOD		0.216245	±	0.0477156		1164.76	±	259.339	*
24h	cWL	1.29939	±	0.309588		3.30904	±	0.362021			<LOD			0.0448093	±	0.0129941			<LOD			<LOD		0.254909	±	0.064459		1254.22	±	197.027
	cRL	1.62738	±	0.348886		4.21216	±	0.471867	***		<LOD			0.0580265	±	0.016678	***		<LOD			<LOD		0.246196	±	0.0437173		994.891	±	237.03	**
48h	cWL	1.56658	±	0.292774		3.21158	±	0.790849			<LOD			0.0555911	±	0.0160162			<LOD			<LOD		0.270648	±	0.0729985		1282.3	±	318.088
	cRL	1.0588	±	0.27224	**	5.10276	±	1.04265	**		<LOD			0.0416589	±	0.00917708	*		<LOD			<LOD		0.25385	±	0.0572517		918.145	±	150.286	*
72h	cWL	1.12963	±	0.150377		2.33591	±	0.284248			<LOD			0.0627396	±	0.0146364			<LOD			<LOD		0.328108	±	0.0577828		1080.95	±	236.017
	cRL	0.966484	±	0.188271	*	3.93761	±	0.903956	**		<LOD			0.0394306	±	0.00851217	***		<LOD			<LOD		0.271469	±	0.0639033	*	918.892	±	170.721	*
120h	cWL	0.912179	±	0.144091		2.80348	±	0.748478			<LOD			0.0631776	±	0.0121327			<LOD			<LOD		0.326413	±	0.0551725		1293.46	±	365.51
	cRL	0.683984	±	0.182064	**	2.37596	±	0.1233			<LOD			0.0260731	±	0.00717454	***		<LOD			<LOD		0.317775	±	0.0754979		1331.26	±	288.682
Time	Light	IAA				oxIAA				IAA-Asp				IAA-Glu
t0		65.6677	±	11.484			<LOD			7.41421	±	1.96425		11.2531	±	3.19816
6h	cWL	107.246	±	15.4224			<LOD			14.1356	±	3.64524		13.9757	±	3.83463
	cRL	93.0542	±	11.3379			<LOD			15.7984	±	3.40247		10.7923	±	2.66766	**
24h	cWL	167.176	±	18.5165			<LOD			85.9959	±	16.8249		17.5449	±	4.57367
	cRL	127.927	±	14.5762	**		<LOD			43.9669	±	14.1723	***	13.7306	±	2.78395
48h	cWL	114.248	±	20.9834		65.5955	±	6.0145		184.303	±	45.311		16.1121	±	2.98919
	cRL	79.476	±	12.2483	***	56.9296	±	5.25241		79.3764	±	21.6634	***	5.99908	±	1.0457	**
72h	cWL	112.097	±	12.3246		75.0828	±	17.3146		166.504	±	35.2911		13.7538	±	2.90423
	cRL	60.5524	±	5.00458	***	84.4535	±	8.53418		51.9842	±	9.86832	***		<LOD
120h	cWL	67.0736	±	7.78585		183.612	±	16.0792		51.6841	±	10.703			<LOD
	cRL	64.8579	±	8.12116		153.983	±	10.8298	*	40.7702	±	8.46731			<LOD

## Sheet: All-Data 18042J
Norway Spruce seedlings were grown for three weeks in long day conditions as described in Methods.
When derooting the seedlings, 5 mm hypocotyl was taken for hormone quantification. This corresponded to time 0 (T0), before transfer to hormone free distilled water for different times.																						Under these 2 conditions :
Then 5 mm basal segments of derooted hypocotyls were harvested at different points:													6h, 6 hours after transferring the cuttings to cWL, cRL									cWL (constant White Light)
													24h, 24 hours after transferring the cuttings to cWL, cRL									cRL (constant Red Light)
													48h, 48 hours after transferring the cuttings to cWL, cRL
													72h, 72 hours after transferring the cuttings to cWL, cRL
Levels of jasmonates, auxins and salicylic acid (pmol/g FW; Mean±SD)
Asterisks indicate statistically significant difference in the light conditions cRL versus cWL in an ANOVA analysis (t-test; *, **, and *** correspond to P-values of 0.05 > p > 0.01, 0.01 > p > 0.001, and p < 0.001 respectively).
	JA					12-OH-JA					9,10-dh-JA					JA-Ile					JA-Val					JA-Trp					JA-Phe					cisOPDA						IAA					oxIAA
R1, t0 A, 21.75 mg FW	0.175744	0.182722	0.137249	±	0.031112	<LOD	<LOD		<LOD		<LOD	<LOD		<LOD		0.0168751	0.0172259	0.0221243	±	0.00694303	<LOD	<LOD		<LOD		<LOD	<LOD		<LOD		<LOD	<LOD	0.174708	±	0.0479285	533.115	581.442	504.983	±	116.619		72.9959	67.3266	65.6677	±	11.484	<LOD	<LOD
R1, t0 A, 21.75 mg FW	0.189701			RSD	0.226683	<LOD					<LOD					0.0175767			RSD	0.31382	<LOD					<LOD					<LOD			RSD	0.274334	629.768			RSD	0.230936		61.6573			RSD	0.17488	<LOD
R2, t0 B, 24.3 mg FW	0.141893	0.110666				<LOD	<LOD				<LOD	<LOD				0.0291167	0.0310825				<LOD	<LOD				<LOD	<LOD				0.155962	0.139971				481.151	594.268					76.5044	77.8492				<LOD	<LOD
R2, t0 B, 24.3 mg FW	0.0794384					<LOD					<LOD					0.0330482					<LOD					<LOD					0.12398					707.385						79.194					<LOD
R3, t0 C, 28.35 mg FW	0.0974844	0.137176				<LOD	<LOD				<LOD	<LOD				0.0259658	0.0281857				<LOD	<LOD				<LOD	<LOD				0.233786	0.233333				464.279	485.856					53.0986	60.0122				<LOD	<LOD
R3, t0 C, 28.35 mg FW	0.176869					<LOD					<LOD					0.0304055					<LOD					<LOD					0.232879					507.432						66.9259					<LOD
R4, t0 D, 38.25 mg FW	0.0999058	0.149291				<LOD	<LOD				<LOD	<LOD				0.0174658	0.0176195				<LOD	<LOD				<LOD	<LOD				0.141017	0.131439				320.108	310.291					51.0084	49.1072				<LOD	<LOD
R4, t0 D, 38.25 mg FW	0.198676					<LOD					<LOD					0.0177731					<LOD					<LOD					0.121861					300.475						47.2059					<LOD
R5, t0 E, 31 mg FW	0.13392	0.10639				<LOD	<LOD				<LOD	<LOD				0.0152864	0.0165077				<LOD	<LOD				<LOD	<LOD				0.220638	0.194091				503.584	553.061					76.8799	74.0434				<LOD	<LOD
R5, t0 E, 31 mg FW	0.0788592					<LOD					<LOD					0.0177291					<LOD					<LOD					0.167544					602.538						71.2069					<LOD
R1, 6h cWL A, 27.3 mg FW	2.43596	2.43596	2.19712	±	0.296862	<LOD	<LOD		<LOD		<LOD	<LOD		<LOD		0.431079	0.431079	0.329963	±	0.0797558	<LOD	<LOD		<LOD		<LOD	<LOD		<LOD		<LOD	<LOD	0.243214	±	0.0182931	938.39	938.39	800.785	±	209.542		132.227	132.227	107.246	±	15.4224	<LOD	<LOD
R2, 6h cWL B, 31.8 mg FW	1.93912	1.98359		RSD	0.135114	<LOD	<LOD				<LOD	<LOD				0.341653	0.326878		RSD	0.241712	<LOD	<LOD				<LOD	<LOD				0.211575	0.216078		RSD	0.075214	674.051	714.488		RSD	0.26167		92.4014	94.2204		RSD	0.143804	<LOD	<LOD
R2, 6h cWL B, 31.8 mg FW	2.02805					<LOD					<LOD					0.312102					<LOD					<LOD					0.220581					754.924						96.0393					<LOD
R3, 6h cWL C, 27 mg FW	1.8155	1.78843				<LOD	<LOD				<LOD	<LOD				0.354777	0.364022				<LOD	<LOD				<LOD	<LOD				0.269581	0.248671				527.812	544.814					100.325	94.812				<LOD	<LOD
R3, 6h cWL C, 27 mg FW	1.76136					<LOD					<LOD					0.373266					<LOD					<LOD					0.227761					561.816						89.2988					<LOD
R4, 6h cWL D, 29 mg FW	2.80915	2.32043				<LOD	<LOD				<LOD	<LOD				0.320374	0.31552				<LOD	<LOD				<LOD	<LOD				0.251778	0.255237				789.598	725.94					112.829	106.272				<LOD	<LOD
R4, 6h cWL D, 29 mg FW	1.83172					<LOD					<LOD					0.310667					<LOD					<LOD					0.258697					662.281						99.714					<LOD
R5, 6h cWL E, 31.15 mg FW	2.43803	2.45718				<LOD	<LOD				<LOD	<LOD				0.199272	0.212314				<LOD	<LOD				<LOD	<LOD				0.248976	0.252868				1007.06	1080.29					112.525	108.698				<LOD	<LOD
R5, 6h cWL E, 31.15 mg FW	2.47634					<LOD					<LOD					0.225355					<LOD					<LOD					0.25676					1153.53						104.872					<LOD
R1, 6h cRL A, 19.25 mg FW	2.16517	2.2722	2.1329	±	0.469972	<LOD	<LOD	0.791612	±	0.0518498	<LOD	<LOD		<LOD		0.325065	0.343141	0.259368	±	0.0546164	<LOD	<LOD		<LOD		<LOD	<LOD		<LOD		<LOD	<LOD	0.216245	±	0.0477156	1342.59	1317.33	1164.76	±	259.339		100.652	103.432	93.0542	±	11.3379	<LOD	<LOD
R1, 6h cRL A, 19.25 mg FW	2.37924			RSD	0.220344	<LOD			RSD	0.065499	<LOD					0.361216			RSD	0.210575	<LOD					<LOD					<LOD			RSD	0.220655	1292.08			RSD	0.222654		106.213			RSD	0.121841	<LOD
R2, 6h cRL B, 28 mg FW	1.88411	2.00366				0.871243	0.83009				<LOD	<LOD				0.290102	0.28635				<LOD	<LOD				<LOD	<LOD				0.196361	0.161999				953.604	906.614					90.7483	93.9516				<LOD	<LOD
R2, 6h cRL B, 28 mg FW	2.12321					0.788936					<LOD					0.282597					<LOD					<LOD					0.127637					859.624						97.155					<LOD
R3, 6h cRL C, 31.1 mg FW	1.58727	1.6931				<LOD	0.812098				<LOD	<LOD				0.207466	0.219607				<LOD	<LOD				<LOD	<LOD				0.224302	0.218679				1360.33	1475.19					76.3527	77.4857				<LOD	<LOD
R3, 6h cRL C, 31.1 mg FW	1.79892					0.812098					<LOD					0.231748					<LOD					<LOD					0.213055					1590.05						78.6187					<LOD
R4, 6h cRL D, 37.5 mg FW	1.81174	1.81785				0.732649	0.732649				<LOD	<LOD				0.246462	0.230387				<LOD	<LOD				<LOD	<LOD				0.206518	0.206518				919.757	886.607					86.4234	86.4234				<LOD	<LOD
R4, 6h cRL D, 37.5 mg FW	1.82397					<LOD					<LOD					0.214311					<LOD					<LOD					<LOD					853.457						<LOD					<LOD
R5, 6h cRL E, 30.7 mg FW	2.9474	2.87769				<LOD	<LOD				<LOD	<LOD				0.230358	0.217355				<LOD	<LOD				<LOD	<LOD				0.310022	0.277785				1466.31	1238.05					107.112	103.978				<LOD	<LOD
R5, 6h cRL E, 30.7 mg FW	2.80797					<LOD					<LOD					0.204352					<LOD					<LOD					0.245549					1009.78						100.844					<LOD
R1, 24h cWL A, 25.1 mg FW	1.49546	1.7825	1.29939	±	0.309588	<LOD	<LOD	3.30904	±	0.362021	<LOD	<LOD		<LOD		0.0645202	0.0645398	0.0448093	±	0.0129941	<LOD	<LOD		<LOD		<LOD	<LOD		<LOD		<LOD	<LOD	0.254909	±	0.064459	1354.09	1383.85	1254.22	±	197.027		186.738	189.109	167.176	±	18.5165	<LOD	<LOD
R1, 24h cWL A, 25.1 mg FW	2.06953			RSD	0.238256	<LOD			RSD	0.109404	<LOD					0.0645593			RSD	0.289987	<LOD					<LOD					<LOD			RSD	0.252871	1413.61			RSD	0.157091		191.479			RSD	0.11076	<LOD
R2, 24h cWL B, 37.35 mg FW	1.0082	1.00609				3.44481	3.47837				<LOD	<LOD				0.0509796	0.0503584				<LOD	<LOD				<LOD	<LOD				0.209438	0.208109				951.773	1006.65					145.903	148.814				<LOD	<LOD
R2, 24h cWL B, 37.35 mg FW	1.00398					3.51193					<LOD					0.0497373					<LOD					<LOD					0.20678					1061.53						151.724					<LOD
R3, 24h cWL C, 34.6 mg FW	0.98512	1.08706				2.92718	3.55536				<LOD	<LOD				0.0404024	0.0409079				<LOD	<LOD				<LOD	<LOD				0.188738	0.214657				919.55	1187.87					161.842	154.706				<LOD	<LOD
R3, 24h cWL C, 34.6 mg FW	1.189					4.18354					<LOD					0.0414134					<LOD					<LOD					0.240575					1456.2						147.57					<LOD
R4, 24h cWL D, 33.2 mg FW	0.761771	1.21416				2.47091	2.89338				<LOD	<LOD				0.0410367	0.0365249				<LOD	<LOD				<LOD	<LOD				0.267632	0.249113				1314.1	1179.33					154.254	158.245				<LOD	<LOD
R4, 24h cWL D, 33.2 mg FW	1.66655					3.31585					<LOD					0.032013					<LOD					<LOD					0.230595					1044.55						162.237					<LOD
R5, 24h cWL E, 28.55 mg FW	1.50225	1.40714				<LOD	<LOD				<LOD	<LOD				0.0347331	0.0317155				<LOD	<LOD				<LOD	<LOD				0.313627	0.347757				1333.82	1513.4					197.361	185.008				<LOD	<LOD
R5, 24h cWL E, 28.55 mg FW	1.31203					<LOD					<LOD					0.0286978					<LOD					<LOD					0.381887					1692.97						172.655					<LOD
R1, 24h cR A, 37.1 mg FW	1.85769	1.85814	1.62738	±	0.348886	<LOD	<LOD	4.21216	±	0.471867	<LOD	<LOD		<LOD		0.0813596	0.0774795	0.0580265	±	0.016678	<LOD	<LOD		<LOD		<LOD	<LOD		<LOD		<LOD	<LOD	0.246196	±	0.0437173	1097.23	1123.43	994.891	±	237.03		123.967	122.598	127.927	±	14.5762	<LOD	<LOD
R1, 24h cR A, 37.1 mg FW	1.85859			RSD	0.214385	<LOD			RSD	0.112025	<LOD					0.0735995			RSD	0.28742	<LOD					<LOD					<LOD			RSD	0.177571	1149.63			RSD	0.238247		121.228			RSD	0.113942	<LOD
R2, 24h cRL B, 25.7 mg FW	2.17814	2.05539				3.73661	3.8785				<LOD	<LOD				0.077005	0.071546				<LOD	<LOD				<LOD	<LOD				0.208745	0.182605				1072.05	1087.24					165.285	152.183				<LOD	<LOD
R2, 24h cRL B, 25.7 mg FW	1.93264					4.02038					<LOD					0.0660869					<LOD					<LOD					0.156464					1102.42						139.081					<LOD
R3, 24h cRL C, 28.85 mg FW	1.52305	1.45897				4.65757	4.54582				<LOD	<LOD				0.0575319	0.0582252				<LOD	<LOD				<LOD	<LOD				0.253603	0.268672				854.074	858.227					121.726	112.938				<LOD	<LOD
R3, 24h cRL C, 28.85 mg FW	1.39489					4.43407					<LOD					0.0589184					<LOD					<LOD					0.283742					862.379						104.15					<LOD
R4, 24h cRL D, 34.25 mg FW	1.75585	1.60789				<LOD	<LOD				<LOD	<LOD				0.0452991	0.0422217				<LOD	<LOD				<LOD	<LOD				0.329529	0.279779				1109.1	1250.65					117.82	125.371				<LOD	<LOD
R4, 24h cRL D, 34.25 mg FW	1.45992					<LOD					<LOD					0.0391442					<LOD					<LOD					0.230029					1392.21						132.921					<LOD
R5, 24h cRLE, 31.8 mg FW	1.07528	1.15653				<LOD	<LOD				<LOD	<LOD				0.0353072	0.0406602				<LOD	<LOD				<LOD	<LOD				0.222215	0.253729				603.435	654.905					131.538	126.546				<LOD	<LOD
R5, 24h cRLE, 31.8 mg FW	1.23777					<LOD					<LOD					0.0460132					<LOD					<LOD					0.285243					706.376						121.554					<LOD
R1, 48h cWL A, 26.3 mg FW	1.30382	1.31959	1.56658	±	0.292774	3.0172	2.9905	3.21158	±	0.790849	<LOD	<LOD		<LOD		0.0518275	0.0522088	0.0555911	±	0.0160162	<LOD	<LOD		<LOD		<LOD	<LOD		<LOD		0.242285	0.22083	0.270648	±	0.0729985	820.771	859.846	1282.3	±	318.088		92.1546	91.8846	114.248	±	20.9834	<LOD	<LOD	65.5955
R1, 48h cWL A, 26.3 mg FW	1.33537			RSD	0.186887	2.96381			RSD	0.246249	<LOD					0.05259			RSD	0.288108	<LOD					<LOD					0.199376			RSD	0.269717	898.921			RSD	0.248061		91.6147			RSD	0.183665	<LOD
R2, 48h cWL B, 38.9 mg FW	1.48093	1.47049				2.5568	2.5548				<LOD	<LOD				0.0612937	0.0605959				<LOD	<LOD				<LOD	<LOD				0.187543	0.170077				1033.35	1065.73					93.9408	95.1854				<LOD	<LOD
R2, 48h cWL B, 38.9 mg FW	1.46005					2.55281					<LOD					0.059898					<LOD					<LOD					0.152611					1098.11						96.4299					<LOD
R3, 48h cWL C, 29.6 mg FW	2.10418	2.05328				4.11655	4.08945				<LOD	<LOD				0.0751146	0.0801247				<LOD	<LOD				<LOD	<LOD				0.346637	0.34839				1371.56	1330.48					119.635	118.374				<LOD	<LOD
R3, 48h cWL C, 29.6 mg FW	2.00239					4.06235					<LOD					0.0851347					<LOD					<LOD					0.350143					1289.4						117.113					<LOD
R4, 48h cWL D, 26 mg FW	1.56306	1.60755				<LOD	<LOD				<LOD	<LOD				0.0324554	0.0377366				<LOD	<LOD				<LOD	<LOD				0.355144	0.31122				1616.89	1542.43					138.248	142.517				64.3612	61.3426
R4, 48h cWL D, 26 mg FW	1.65204					<LOD					<LOD					0.0430178					<LOD					<LOD					0.267296					1467.97						146.785					58.324
R5, 48h cWL E, 25.4 mg FW	1.17268	1.382				<LOD	<LOD				<LOD	<LOD				0.0427552	0.0472897				<LOD	<LOD				<LOD	<LOD				0.334426	0.302725				1403.07	1613					124.043	123.28				66.9535	69.8484
R5, 48h cWL E, 25.4 mg FW	1.59131					<LOD					<LOD					0.0518242					<LOD					<LOD					0.271024					1822.92						122.517					72.7433
R1, 48h cRL A, 23.65 mg FW	1.35445	1.42722	1.0588	±	0.27224	4.60694	4.4053	5.10276	±	1.04265	<LOD	<LOD		<LOD		0.0317746	0.0308704	0.0416589	±	0.00917708	<LOD	<LOD		<LOD		<LOD	<LOD		<LOD		0.185267	0.186019	0.25385	±	0.0572517	1073.35	1071.32	918.145	±	150.286		71.6159	76.0806	79.476	±	12.2483	<LOD	<LOD	56.9296
R1, 48h cRL A, 23.65 mg FW	1.49999			RSD	0.257121	4.20365			RSD	0.204331	<LOD					0.0299663			RSD	0.220291	<LOD					<LOD					0.186771			RSD	0.225534	1069.29			RSD	0.163684		80.5453			RSD	0.154113	<LOD
R2, 48h cRL B, 24.35 mg FW	0.837902	0.818976				5.46136	4.60162				<LOD	<LOD				0.0577808	0.0555546				<LOD	<LOD				<LOD	<LOD				0.220441	0.205751				904.745	770.346					71.5901	69.2833				<LOD	<LOD
R2, 48h cRL B, 24.35 mg FW	0.800049					3.74187					<LOD					0.0533285					<LOD					<LOD					0.191062					635.946						66.9765					<LOD
R3, 48h cRL C, 31.65 mg FW	0.860159	0.859693				5.94755	6.30136				<LOD	<LOD				0.0366364	0.0413809				<LOD	<LOD				<LOD	<LOD				0.239932	0.261178				711.907	753.599					66.1111	67.2714				<LOD	<LOD
R3, 48h cRL C, 31.65 mg FW	0.859227					6.65517					<LOD					0.0461255					<LOD					<LOD					0.282423					795.292						68.4317					<LOD
R4, 48h cRL D, 31.5 mg FW	1.45702	1.26882				<LOD	<LOD				<LOD	<LOD				0.0483007	0.0368301				<LOD	<LOD				<LOD	<LOD				0.304437	0.297067				950.255	1049.17					92.9617	91.1326				62.8704	53.2156
R4, 48h cBL D, 31.85 mg FW	1.08061					<LOD					<LOD					0.0253596					<LOD					<LOD					0.289697					1148.09						89.3035					43.5607
R5, 48h cRL E, 31 mg FW	0.869981	0.919303				<LOD	<LOD				<LOD	<LOD				0.0525368	0.0436585				<LOD	<LOD				<LOD	<LOD				0.260982	0.319234				1101.49	946.285					92.4448	93.6123				64.8267	60.6436
R5, 48h cRL E, 31 mg FW	0.968625					<LOD					<LOD					0.0347803					<LOD					<LOD					0.377486					791.076						94.7798					56.4605
R1, 72h cWL A, 24.65 mg FW	1.13122	1.32027	1.12963	±	0.150377	2.79628	2.58999	2.33591	±	0.284248	<LOD	<LOD		<LOD		0.0835999	0.0839312	0.0627396	±	0.0146364	<LOD	<LOD		<LOD		<LOD	<LOD		<LOD		0.211812	0.240011	0.328108	±	0.0577828	1050.74	964.031	1080.95	±	236.017		101.674	105.848	112.097	±	12.3246	<LOD	<LOD	75.0828
R1, 72h cWL A, 24.65 mg FW	1.50933			RSD	0.133121	2.38371			RSD	0.121686	<LOD					0.0842626			RSD	0.233288	<LOD					<LOD					0.26821			RSD	0.176109	877.321			RSD	0.218343		110.021			RSD	0.109946	<LOD
R2, 72h cWL B, 24.25 mg FW	1.32868	1.19747				2.01311	2.02893				<LOD	<LOD				0.0716697	0.0697678				<LOD	<LOD				<LOD	<LOD				0.329254	0.337647				920.432	846.596					123.394	119.264				<LOD	<LOD
R2, 72h cWL B, 24.25 mg FW	1.06627					2.04475					<LOD					0.067866					<LOD					<LOD					0.34604					772.761						115.135					<LOD
R3, 72h cWL C, 33 mg FW	1.04704	0.957542				2.29578	2.38881				<LOD	<LOD				0.0503919	0.0521786				<LOD	<LOD				<LOD	<LOD				0.29639	0.309844				772.029	925.923					94.0673	93.2519				<LOD	<LOD
R3, 72h cWL C, 33 mg FW	0.868048					2.48184					<LOD					0.0539652					<LOD					<LOD					0.323297					1079.82						92.4364					<LOD
R4, 72h cWL D, 31.4 mg FW	0.996541	0.996541				<LOD	<LOD				<LOD	<LOD				0.0471661	0.0471661				<LOD	<LOD				<LOD	<LOD				0.392052	0.392052				1302.27	1302.27					121.873	121.873				62.8395	62.8395
R5, 72h cWL E, 33.15 mg FW	1.13933	1.17631				<LOD	<LOD				<LOD	<LOD				0.059044	0.0606545				<LOD	<LOD				<LOD	<LOD				0.371973	0.360987				1650.19	1365.92					126.699	120.249				82.3217	87.3261
R5, 72h cWL E, 33.15 mg FW	1.2133					<LOD					<LOD					0.0622649					<LOD					<LOD					0.350001					1081.65						113.8					92.3306
R1, 72h cRL A, 25.7 mg FW	0.848052	0.844638	0.966484	±	0.188271	3.43495	3.44144	3.93761	±	0.903956	<LOD	<LOD		<LOD		0.0417067	0.0405757	0.0394306	±	0.00851217	<LOD	<LOD		<LOD		<LOD	<LOD		<LOD		0.165029	0.180193	0.271469	±	0.0639033	1224.95	1092.52	918.892	±	170.721		61.3465	61.7028	60.5524	±	5.00458	<LOD	<LOD	84.4535
R1, 72h cRL A, 25.7 mg FW	0.841223			RSD	0.1948	3.44794			RSD	0.22957	<LOD					0.0394446			RSD	0.215877	<LOD					<LOD					0.195357			RSD	0.235398	960.084			RSD	0.18579		62.0591			RSD	0.0826488	<LOD
R2, 72h cRL B, 28.2 mg FW	1.00013	1.0002				3.53855	3.39039				<LOD	<LOD				0.051086	0.0494536				<LOD	<LOD				<LOD	<LOD				0.212587	0.229758				712.12	739.686					54.6259	52.6627				<LOD	<LOD
R2, 72h cRL B, 28.2 mg FW	1.00026					3.24224					<LOD					0.0478212					<LOD					<LOD					0.246929					767.251						50.6994					<LOD
R3, 72h cRL C, 24.1 mg FW	0.869175	0.77173				4.55029	4.98099				<LOD	<LOD				0.043175	0.0429233				<LOD	<LOD				<LOD	<LOD				0.295254	0.327738				671.357	743.984					69.4352	66.54				<LOD	<LOD
R3, 72h cRL C, 24.1 mg FW	0.674285					5.4117					<LOD					0.0426716					<LOD					<LOD					0.360221					816.611						63.6449					<LOD
R4, 72h cRL D, 26.6 mg FW	1.29522	1.26262				<LOD	<LOD				<LOD	<LOD				0.024863	0.0262526				<LOD	<LOD				<LOD	<LOD				0.293775	0.318618				1175.54	1070.13					65.7008	60.4393				99.1683	90.4881
R4, 72h cRL D, 26.6 mg FW	1.23002					<LOD					<LOD					0.0276422					<LOD					<LOD					0.343462					964.721						55.1778					81.8078
R5, 72h cRL E, 40.9 mg FW	0.942184	0.953234				<LOD	<LOD				<LOD	<LOD				0.0319059	0.0379476				<LOD	<LOD				<LOD	<LOD				0.370422	0.301036				816.642	948.141					53.8574	61.417				79.4326	78.4189
R5, 72h cRL E, 40.9 mg FW	0.964283					<LOD					<LOD					0.0439894					<LOD					<LOD					0.23165					1079.64						68.9766					77.4052
R1, 120h cWL A, 35.25 mg FW	0.831525	0.85087	0.912179	±	0.144091	1.93531	1.96737	2.80348	±	0.748478	<LOD	<LOD		<LOD		0.0655303	0.0663902	0.0631776	±	0.0121327	<LOD	<LOD		<LOD		<LOD	<LOD		<LOD		0.242034	0.25488	0.326413	±	0.0551725	1628.01	1569.55	1293.46	±	365.51		56.9565	57.3321	67.0736	±	7.78585	<LOD	<LOD	183.612
R1, 120h cWL A, 35.25 mg FW	0.870215			RSD	0.157964	1.99944			RSD	0.266981	<LOD					0.06725			RSD	0.192042	<LOD					<LOD					0.267727			RSD	0.169026	1511.1			RSD	0.282583		57.7078			RSD	0.116079	<LOD
R2, 120h cWL B, 32.2 mg FW	0.873264	0.779697				3.34382	3.41103				<LOD	<LOD				0.0607714	0.0618679				<LOD	<LOD				<LOD	<LOD				0.313953	0.291429				1633.15	1709.59					63.7139	64.2413				<LOD	<LOD
R2, 120h cWL B, 32.2 mg FW	0.686129					3.47825					<LOD					0.0629645					<LOD					<LOD					0.268904					1786.02						64.7686					<LOD
R3, 120h cWL C, 36.5 mg FW	0.901031	0.795839				3.08044	3.03204				<LOD	<LOD				0.0625946	0.0606007				<LOD	<LOD				<LOD	<LOD				0.306618	0.332378				855.477	888.002					66.5697	63.7998				<LOD	<LOD
R3, 120h cWL C, 36.5 mg FW	0.690647					2.98364					<LOD					0.0586068					<LOD					<LOD					0.358138					920.526						61.03					<LOD
R4, 120h cWL D, 44.5 mg FW	1.08423	1.05971				<LOD	<LOD				<LOD	<LOD				0.0409142	0.0466341				<LOD	<LOD				<LOD	<LOD				0.314427	0.357399				1201.42	1349.44					71.3117	73.7185				<LOD	172.243
R4, 120h cWL D, 44.5 mg FW	1.0352					<LOD					<LOD					0.0523539					<LOD					<LOD					0.400372					1497.46						76.1253					172.243
R5, 120h cWL E, 41.75 mg FW	1.03534	1.07477				<LOD	<LOD				<LOD	<LOD				0.0722975	0.0803953				<LOD	<LOD				<LOD	<LOD				0.334065	0.395979				906.291	950.719					78.688	76.2761				194.78	194.982
R5, 120h cWL E, 41.75 mg FW	1.1142					<LOD					<LOD					0.088493					<LOD					<LOD					0.457893					995.146						73.8643					195.184
R1, 120 h cRL A, 24.9 mg FW	0.703249	0.722857	0.683984	±	0.182064	2.43176	2.49226	2.37596	±	0.1233	<LOD	<LOD		<LOD		0.0223067	0.0225117	0.0260731	±	0.00717454	<LOD	<LOD		<LOD		<LOD	<LOD		<LOD		0.206883	0.227154	0.317775	±	0.0754979	1885.21	1693.96	1331.26	±	288.682		81.2143	77.2655	64.8579	±	8.12116	<LOD	<LOD	153.983
R1, 120 h cRL A, 24.9 mg FW	0.742464			RSD	0.266181	2.55277			RSD	0.051895	<LOD					0.0227168			RSD	0.27517	<LOD					<LOD					0.247425			RSD	0.237583	1502.72			RSD	0.216849		73.3168			RSD	0.125215	<LOD
R2, 120 h cRL B, 40.25 mg FW	0.525516	0.540342				2.33836	2.24669				<LOD	<LOD				0.0293805	0.0292304				<LOD	<LOD				<LOD	<LOD				0.243997	0.25232				1079.23	1010.28					53.2388	55.9964				<LOD	<LOD
R2, 120 h cRL B, 40.25 mg FW	0.555167					2.15501					<LOD					0.0290802					<LOD					<LOD					0.260644					941.336						58.7539					<LOD
R3, 120 h cRL C, 33.5 mg FW	0.652662	0.659946				2.35227	2.38892				<LOD	<LOD				0.033037	0.0331418				<LOD	<LOD				<LOD	<LOD				0.337046	0.331937				1041.24	1114.59					60.9985	60.1604				<LOD	<LOD
R3, 120 h cRL C, 33.5 mg FW	0.667229					2.42558					<LOD					0.0332466					<LOD					<LOD					0.326828					1187.93						59.3224					<LOD
R4, 120 h cRL D, 30 mg FW	0.956969	0.973744				<LOD	<LOD				<LOD	<LOD				0.0226335	0.0301931				<LOD	<LOD				<LOD	<LOD				0.395469	0.384691				1644.08	1553.86					68.909	67.5081				157.602	161.641
R4, 120 h cRL D, 30 mg FW	0.990519					<LOD					<LOD					0.0377527					<LOD					<LOD					0.373913					1463.64						66.1073					165.68
R5, 120 h cRL E, 38.65 mg FW	0.618241	0.523031				<LOD	<LOD				<LOD	<LOD				0.0140922	0.0152887				<LOD	<LOD				<LOD	<LOD				0.411559	0.392775				1297.57	1283.58					63.1376	63.359				143.361	146.325
R5, 120 h cRL E, 38.65 mg FW	0.427821					<LOD					<LOD					0.0164851					<LOD					<LOD					0.37399					1269.6						63.5804					149.29
[truncated: 12 more columns]
